# Supplementary material for: The rapid production of multiple transition metal carbides via microwave combustion under ambient conditions
Source: Royal Society of Chemistry journal article supplement (doi:10.1039/d0nr05223j), 2020-01-01
Supplement: d0nr05223j1.pdf [file d0nr05223j1.pdf]

## Supporting Information

### Rapid Production of Multiple Transition Metal Carbides via Microwave Combustion under Ambient Conditions

Huiyu Jiang, ‡<sup>a</sup> Junfeng Li, ‡<sup>a</sup> Zhiheng Xiao,<sup>b</sup> Bo Wang,<sup>c</sup> Mingzhao Fan,<sup>a</sup> Siqi Xu,<sup>a</sup> and Jun Wan<sup>\*a,b</sup>

<sup>a</sup>Hubei Key Laboratory of Biomass Fiber and Ecological Dyeing and Finishing, Wuhan Textile University, Wuhan 430200, Hubei, China.

<sup>b</sup>State Key Laboratory for Hubei New Textile Materials and Advanced Processing Technology, Wuhan Textile University, Wuhan 430200, Hubei, China.

<sup>c</sup>School of Electrical Engineering and Automation, Luoyang Institute of Science and Technology, Luoyang 471023, Henan, China.

‡ These authors contributed equally to the work.

\*Correspondence author: wanj@wtu.edu.cn

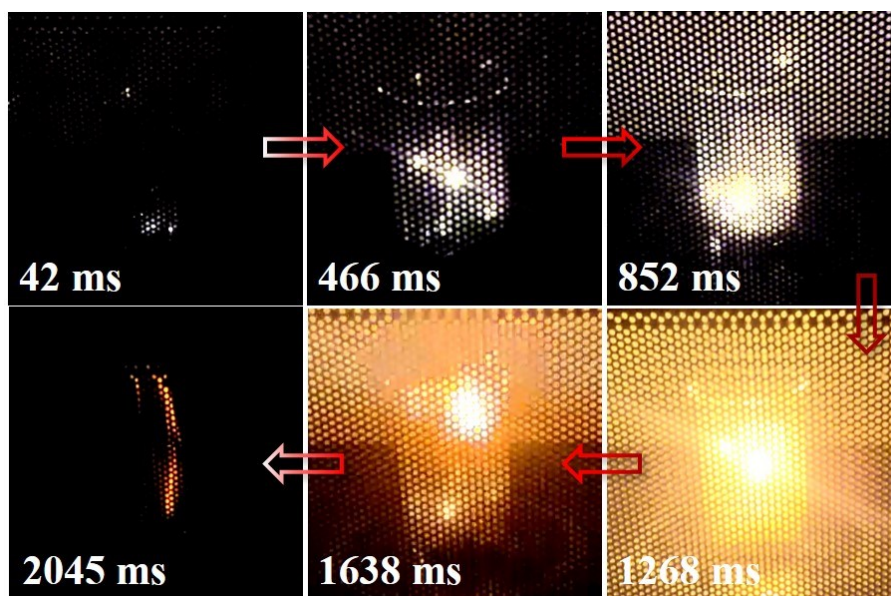

**Figure S1.** A series of photographs showing the sample during flash ignition with the time interval labeled in two seconds.

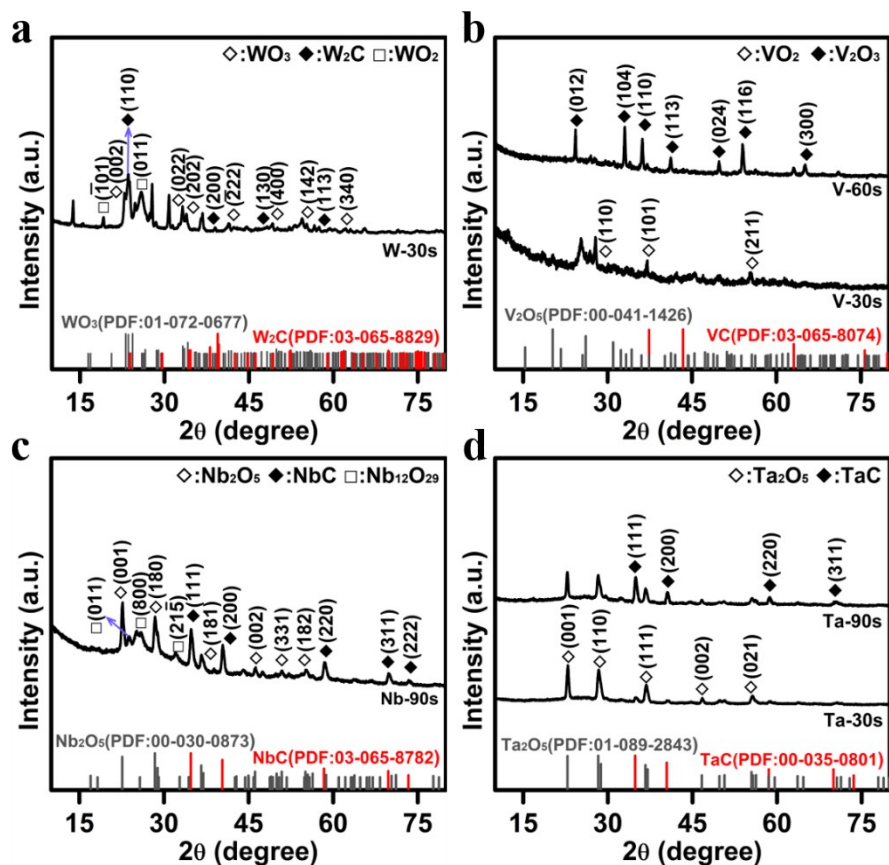

**Figure S2.** XRD patterns of intermediate reaction condition samples. (a) XRD pattern of the precursor of WO<sub>3</sub>/GO composite after microwave treating for 30 s. (b) XRD patterns of V<sub>2</sub>O<sub>5</sub>/GO composites after microwave treating for 30 s and 60 s. (c) XRD pattern of Nb<sub>2</sub>O<sub>5</sub>/GO composite after microwave treating for 90 s. (d) XRD patterns of Ta<sub>2</sub>O<sub>5</sub>/GO composites after microwave treating for 30 s and 90 s.

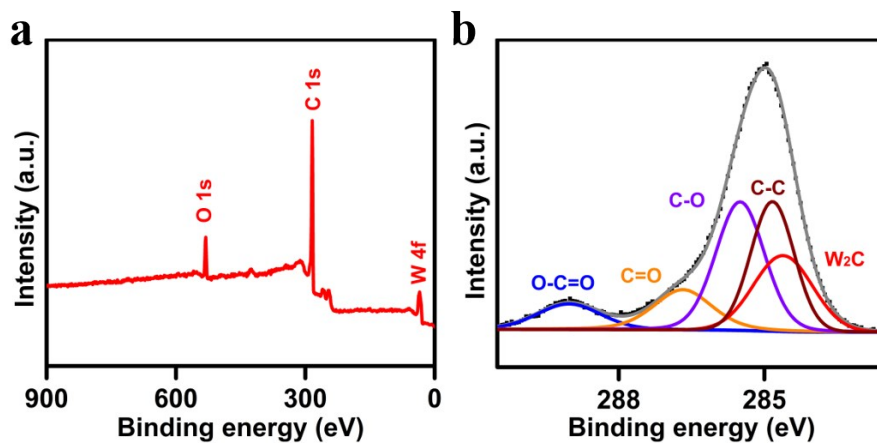

**Figure S3.** (a) XPS survey spectra and (b) C 1s peaks of the W<sub>2</sub>C-90s sample.

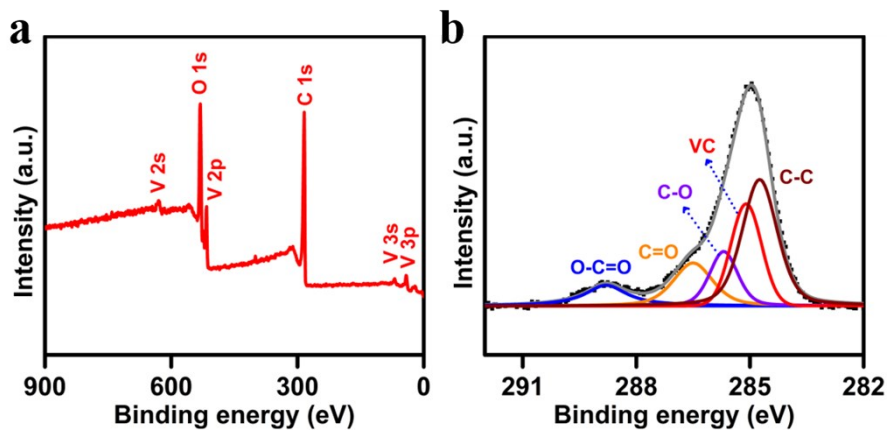

**Figure S4.** (a) XPS survey spectra and (b) C 1s peaks of the VC-120s sample.

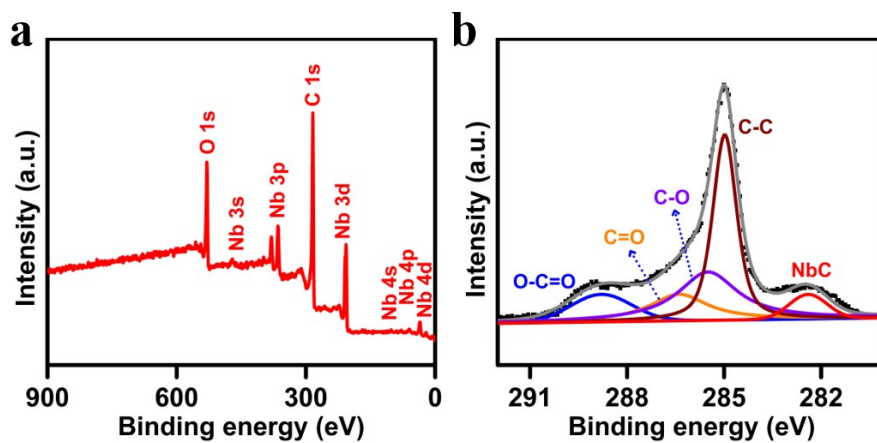

**Figure S5.** (a) XPS survey spectra and (b) C 1s peaks of the NbC-120s sample.

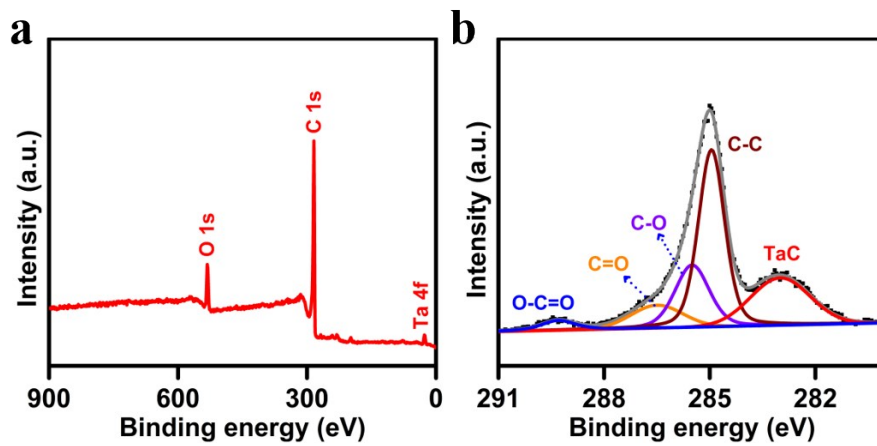

**Figure S6.** (a) XPS survey spectra and (b) C 1s peaks of the TaC-140s sample.

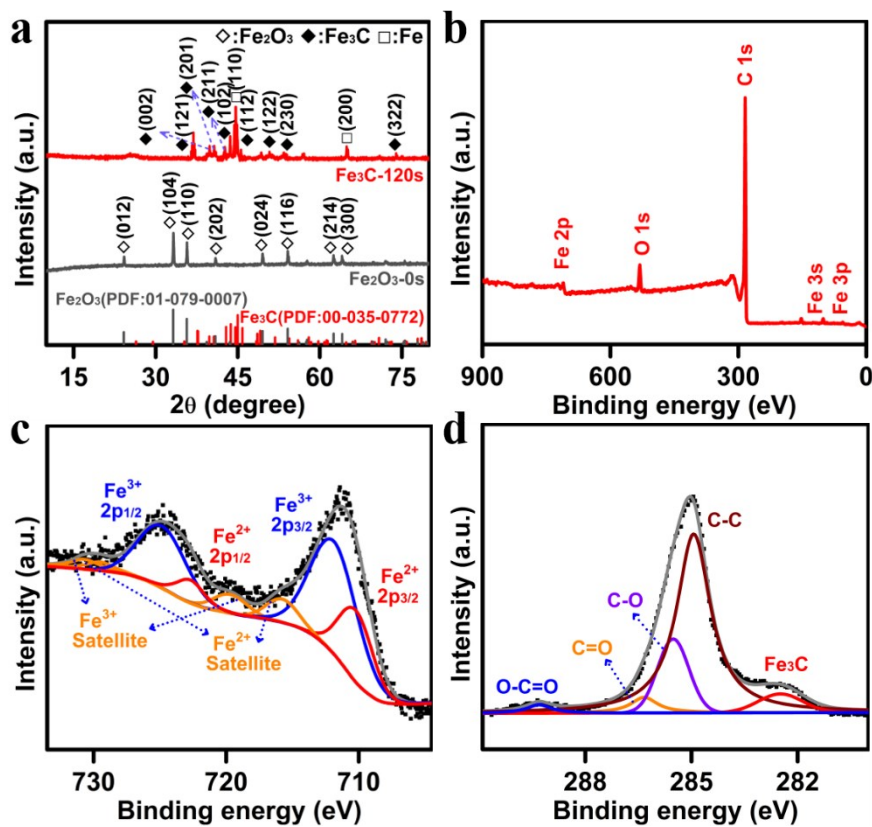

**Figure S7.** (a) XRD patterns of the pre-synthesis and completed reaction condition samples. (b) XPS survey spectra. (c) Core level Fe 2p XPS spectra and (d) C 1s peaks of the Fe<sub>3</sub>C-120s sample.

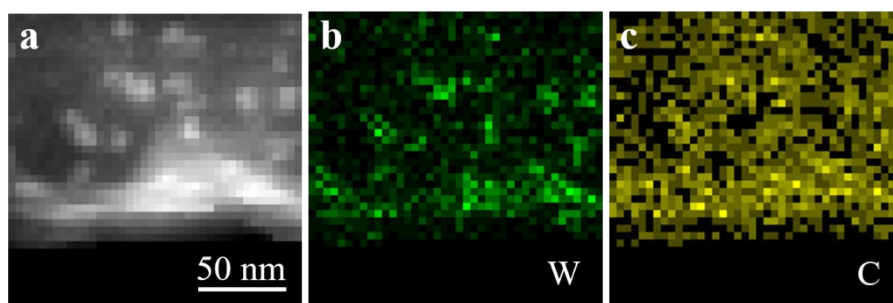

**Figure S8.** EDS elemental mapping scanning of the  $W_2C$ -90s sample from TEM.

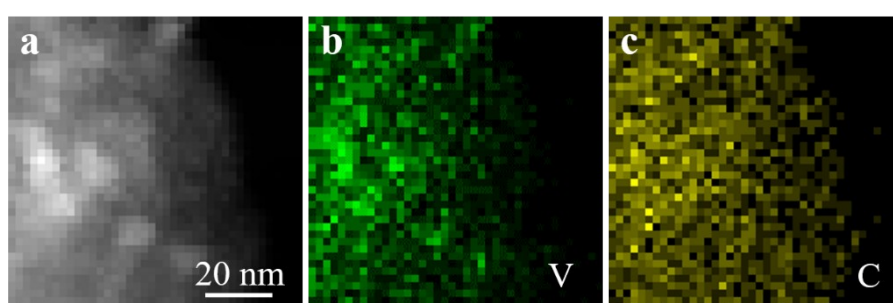

**Figure S9.** EDS elemental mapping scanning of the VC-120s sample from TEM.

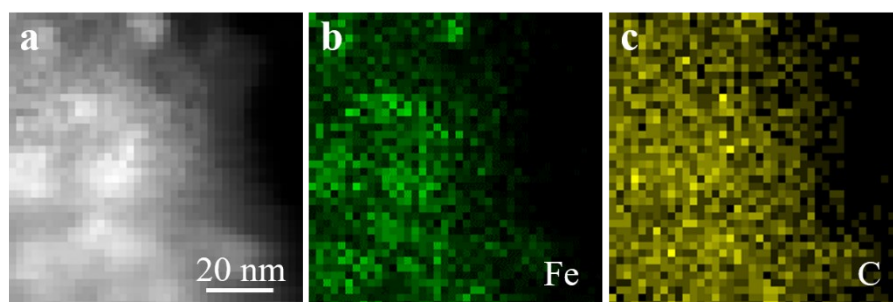

**Figure S10.** EDS elemental mapping scanning of the  $Fe_3C$ -120s sample from TEM.



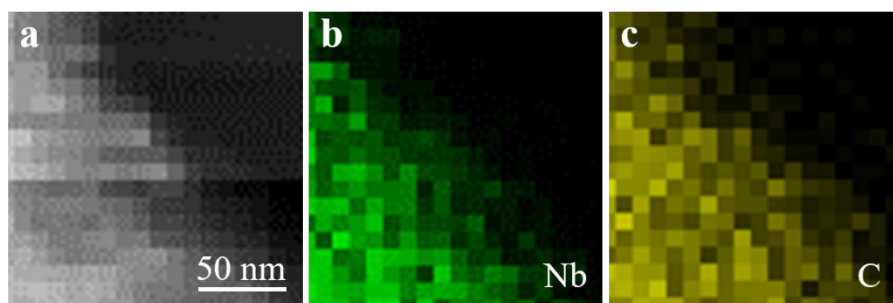

**Figure S11.** EDS elemental mapping scanning of the NbC-120s sample from TEM.

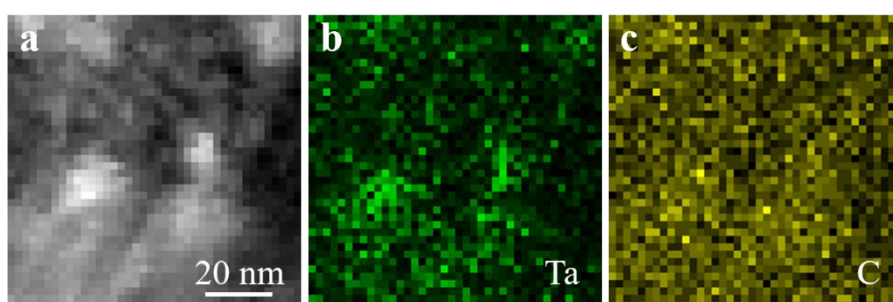

**Figure S12.** EDS elemental mapping scanning of the TaC-140s sample from TEM.

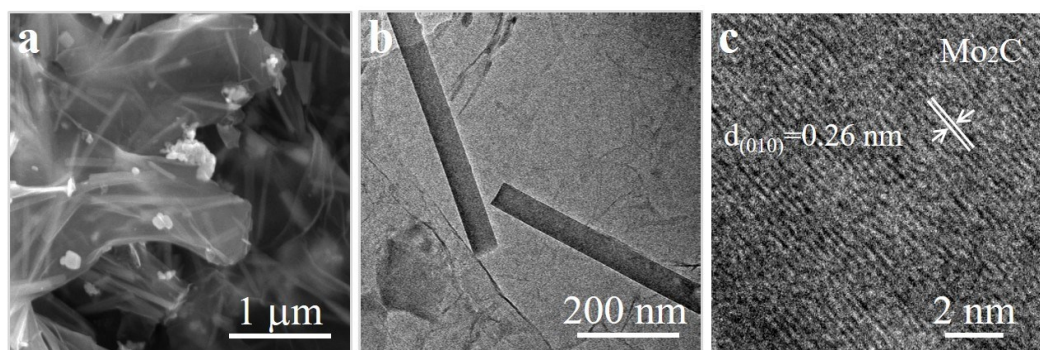

**Figure S13.** (a) SEM of the MoO<sub>3</sub>/GO composite. (b,c) TEM and High-resolution images of the Mo<sub>2</sub>C-120s sample.

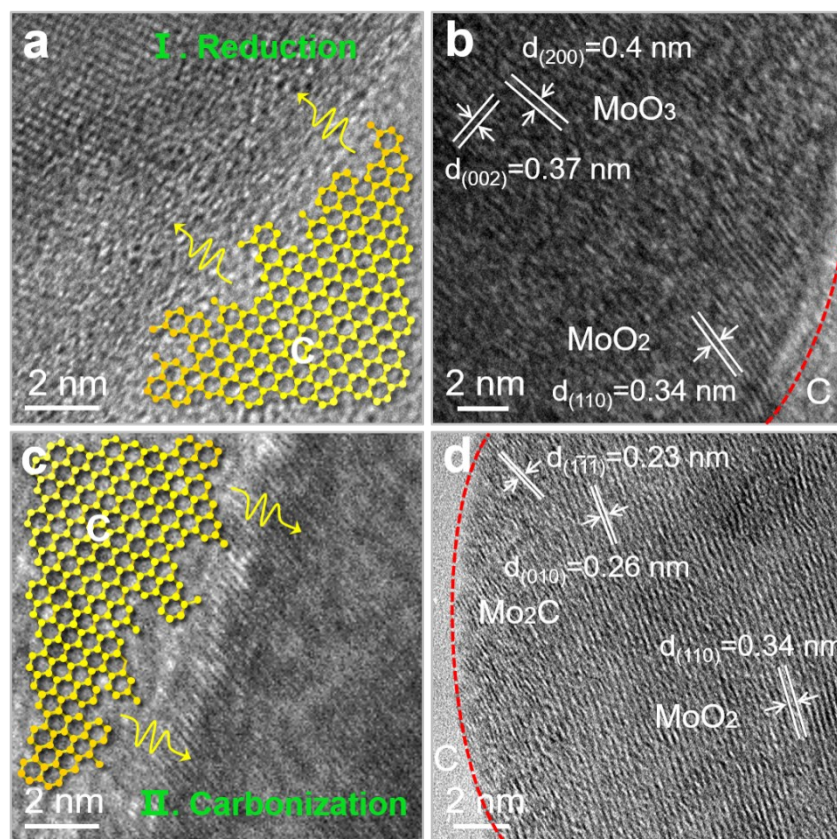

**Figure S14.** The High-resolution TEM images of the Mo-6s and Mo-100s samples. (a) The reduction process from MoO<sub>3</sub> to MoO<sub>2</sub>. (b) The transition boundary of reduction between two crystalline phases. (c) The carbonization process from MoO<sub>2</sub> to Mo<sub>2</sub>C. (d) The transition boundary of carbonization between MoO<sub>2</sub> and Mo<sub>2</sub>C phases.

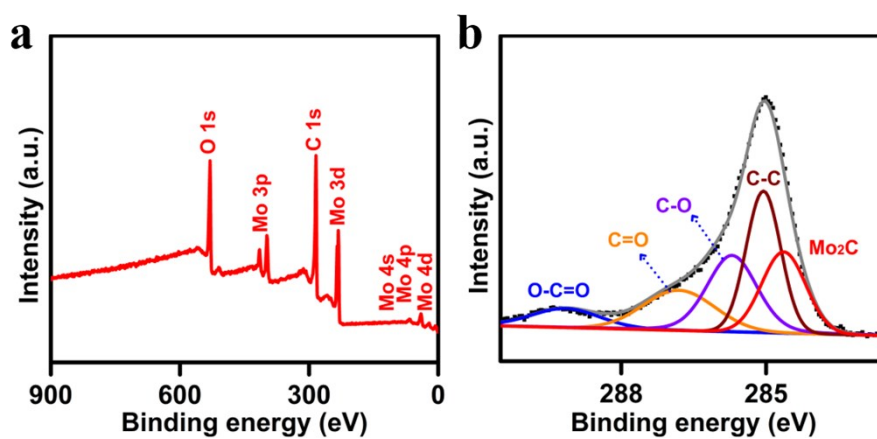

**Figure S15.** (a) XPS survey spectra and (b) C 1s peaks of the Mo<sub>2</sub>C-120s sample.

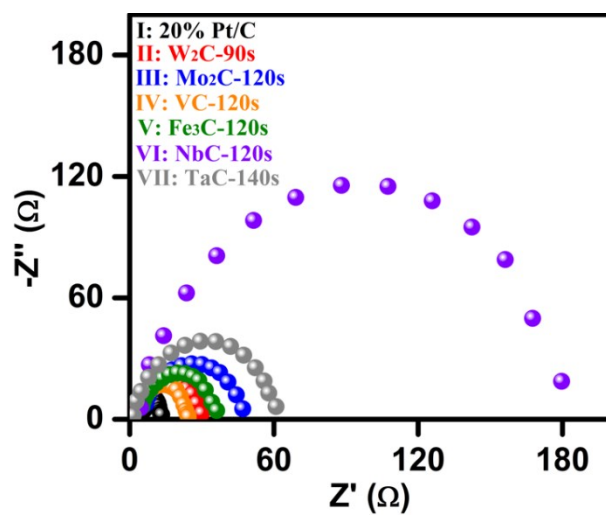

**Figure S16.** Nyquist plots of the above carbide electrocatalysts.

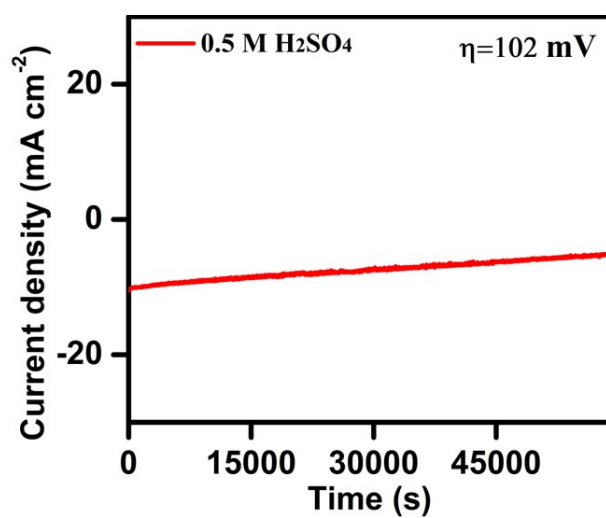

**Figure S17.** The long-term durability test of VC-120s sample at  $\eta=102$  mV in 0.5 M  $\text{H}_2\text{SO}_4$ .



| Table S1   Comparison of HER performance in acid media with other electrocatalysts. |                                   |                                       |                                |                                                        |                                        |                                              |
|-------------------------------------------------------------------------------------|-----------------------------------|---------------------------------------|--------------------------------|--------------------------------------------------------|----------------------------------------|----------------------------------------------|
| Catalyst                                                                            | Loading<br>(mg cm <sup>-2</sup> ) | Electrolyte                           | Onset potential<br>(mV vs RHE) | Overpotential at 10 mA cm <sup>-2</sup><br>(mV vs RHE) | Tafel slope<br>(mV dec <sup>-1</sup> ) | Ref.                                         |
| W <sub>2</sub> C/rGO                                                                | 0.55                              | 0.5 M H <sub>2</sub> SO <sub>4</sub>  | 38                             | 120                                                    | 51                                     | This work.                                   |
| Mo <sub>2</sub> C/rGO                                                               | 0.55                              | 0.5 M H <sub>2</sub> SO <sub>4</sub>  | 45                             | 138                                                    | 55                                     | This work.                                   |
| VC/rGO                                                                              | 0.55                              | 0.5 M H <sub>2</sub> SO <sub>4</sub>  | 21                             | 88                                                     | 56                                     | This work.                                   |
| Fe <sub>3</sub> C/rGO                                                               | 0.55                              | 0.5 M H <sub>2</sub> SO <sub>4</sub>  | 30                             | 116                                                    | 68                                     | This work.                                   |
| NbC/rGO                                                                             | 0.55                              | 0.5 M H <sub>2</sub> SO <sub>4</sub>  | 126                            | 265                                                    | 112                                    | This work.                                   |
| TaC/rGO                                                                             | 0.55                              | 0.5 M H <sub>2</sub> SO <sub>4</sub>  | 48                             | 166                                                    | 93                                     | This work.                                   |
| W <sub>2</sub> C/MWNT                                                               | 0.556                             | 0.5 M H <sub>2</sub> SO <sub>4</sub>  | 50                             | 123                                                    | 45                                     | Nat. Commun.<br>2016, 7, 13216.              |
| WC NPs                                                                              | 1                                 | 0.5 M H <sub>2</sub> SO <sub>4</sub>  | 100                            | 125                                                    | 84                                     | ChemSusChem<br>2013, 6, 168.                 |
| P-W <sub>2</sub> C@NC                                                               | 3.5                               | 0.5 M H <sub>2</sub> SO <sub>4</sub>  | 45                             | 89                                                     | 53                                     | J. Mater. Chem. A<br>2017, 5, 765.           |
| Fe-WCN                                                                              | 0.4                               | PH=1 H <sub>2</sub> SO <sub>4</sub>   | ~100                           | 220                                                    | 47.1                                   | Angew. Chem., Int Ed.<br>2013, 52, 13638.    |
| α-WC/CB                                                                             | 0.724                             | 0.5 M H <sub>2</sub> SO <sub>4</sub>  | <50                            | 260                                                    | ---                                    | Angew. Chem., Int Ed.<br>2014, 53, 5131.     |
| WC-CNTs                                                                             | ---                               | 0.05 M H <sub>2</sub> SO <sub>4</sub> | 15                             | 145                                                    | 72                                     | ACS Nano<br>2015, 9, 5125.                   |
| Porous WC<br>thin film                                                              | 0.16                              | 0.5 M H <sub>2</sub> SO <sub>4</sub>  | 120                            | 274                                                    | 67                                     | J. Mater. Chem. A<br>2015, 3, 5798.          |
| Thin film W <sub>2</sub> C                                                          | ---                               | 0.5 M H <sub>2</sub> SO <sub>4</sub>  | ---                            | >300                                                   | 69                                     | J. Am. Chem. Soc.<br>2012, 134, 3025.        |
| W <sub>2</sub> C microspheres                                                       | ---                               | 1 M H <sub>2</sub> SO <sub>4</sub>    | 50                             | ~170                                                   | 118                                    | Int. J. Hydrogen. Energ<br>2008, 33, 6865.   |
| Co <sub>6</sub> W <sub>6</sub> C                                                    | 0.28                              | 0.5 M H <sub>2</sub> SO <sub>4</sub>  | 26                             | 200                                                    | 75                                     | Nanoscale<br>2015, 7, 3130.                  |
| Mo <sub>2</sub> C@NPC/NPRGO                                                         | 0.14                              | 0.5 M H <sub>2</sub> SO <sub>4</sub>  | 0                              | 34                                                     | 33.6                                   | Nat Commun.<br>2016, 7, 11204.               |
| Mo <sub>2</sub> C/NCF                                                               | 0.28                              | 0.5 M H <sub>2</sub> SO <sub>4</sub>  | 40                             | 144                                                    | 55                                     | ACS Nano<br>2016, 10, 11337.                 |
| 2D-N,Co-Mo <sub>2</sub> C                                                           | 0.55                              | 0.1 M HClO <sub>4</sub>               | 25                             | 71                                                     | 40                                     | Adv. Funct. Mater.<br>2017, 1703933.         |
| Co-Mo <sub>2</sub> C-0.020                                                          | 0.14                              | 0.5 M H <sub>2</sub> SO <sub>4</sub>  | 40                             | 140                                                    | 39                                     | Adv. Funct. Mater.<br>2016, 26, 5590.        |
| Mo <sub>2</sub> C/RGO                                                               | 0.285                             | 0.5 M H <sub>2</sub> SO <sub>4</sub>  | 70                             | 130                                                    | 57.3                                   | Chem. Commun.<br>2014, 50, 13135.            |
| Mo <sub>2</sub> C/CNT-GR                                                            | 0.65                              | 0.5 M H <sub>2</sub> SO <sub>4</sub>  | 62                             | 130                                                    | 58                                     | ACS Nano<br>2014, 8, 5164.                   |
| Mo <sub>2</sub> C@NC                                                                | 0.28                              | 0.5 M H <sub>2</sub> SO <sub>4</sub>  | ---                            | 124                                                    | 60                                     | Angew. Chem. Int. Ed.<br>2015, 54, 10752.    |
| Mo <sub>2</sub> C nanotubes                                                         | 0.75                              | 0.5 M H <sub>2</sub> SO <sub>4</sub>  | 82                             | 172                                                    | 62                                     | Angew. Chem. Int. Ed.<br>2015, 54, 15395.    |
| np-Mo <sub>2</sub> C NWs                                                            | 0.21                              | 0.5 M H <sub>2</sub> SO <sub>4</sub>  | 70                             | 130                                                    | 53                                     | Energy Environ. Sci.<br>2014, 7, 387.        |
| Mo <sub>2</sub> C/CNT                                                               | 2.0                               | 0.1 M HClO <sub>4</sub>               | ---                            | 152                                                    | 65                                     | Energy Environ. Sci.<br>2013, 6, 943.        |
| Fe <sub>3</sub> C-GNRs                                                              | ---                               | 0.5 M H <sub>2</sub> SO <sub>4</sub>  | 32                             | 49                                                     | 46                                     | ACS Nano<br>2015, 9, 7407.                   |
| Fe <sub>3</sub> C-Mo <sub>2</sub> C/NC                                              | 0.14                              | 0.5 M H <sub>2</sub> SO <sub>4</sub>  | 42                             | 116                                                    | 43                                     | ChemSusChem<br>2017, 10, 2597.               |
| Fe <sub>3</sub> C/Mo <sub>2</sub> C@NPGC                                            | 0.14                              | 0.5 M H <sub>2</sub> SO <sub>4</sub>  | 18                             | 98                                                     | 45.2                                   | J. Mater. Chem. A<br>2016, 4, 1202.          |
| VC-NS                                                                               | 0.28                              | 0.5 M H <sub>2</sub> SO <sub>4</sub>  | ---                            | 98                                                     | 56                                     | Nano Energy<br>2016, 26, 603.                |
| 2D TaC-RGO                                                                          | 0.64                              | 0.5 M H <sub>2</sub> SO <sub>4</sub>  | 19                             | 167                                                    | 58                                     | Chem. Commun.<br>2016, 52, 8810.             |
| NbC100                                                                              | ---                               | 0.1 M H <sub>2</sub> SO <sub>4</sub>  | >100                           | 470                                                    | 35                                     | ACS Appl. Mat. Interfaces<br>2017, 9, 30872. |

HER, H<sub>2</sub> evolution reaction; Pt-C, 20 wt% Pt on carbon lack from Johnson–Matthey; RHE, reversible hydrogen electrode.
